# Supplementary material for: Altered Follicular Fluid Metabolic Pattern Correlates with Female Infertility and Outcome Measures of In Vitro Fertilization
Source: MDPI journal article supplement (doi:10.3390/ijms22168735), 2021-08-14
Supplement: s1 [file s1]

## SUPPLEMENTARY MATERIALS

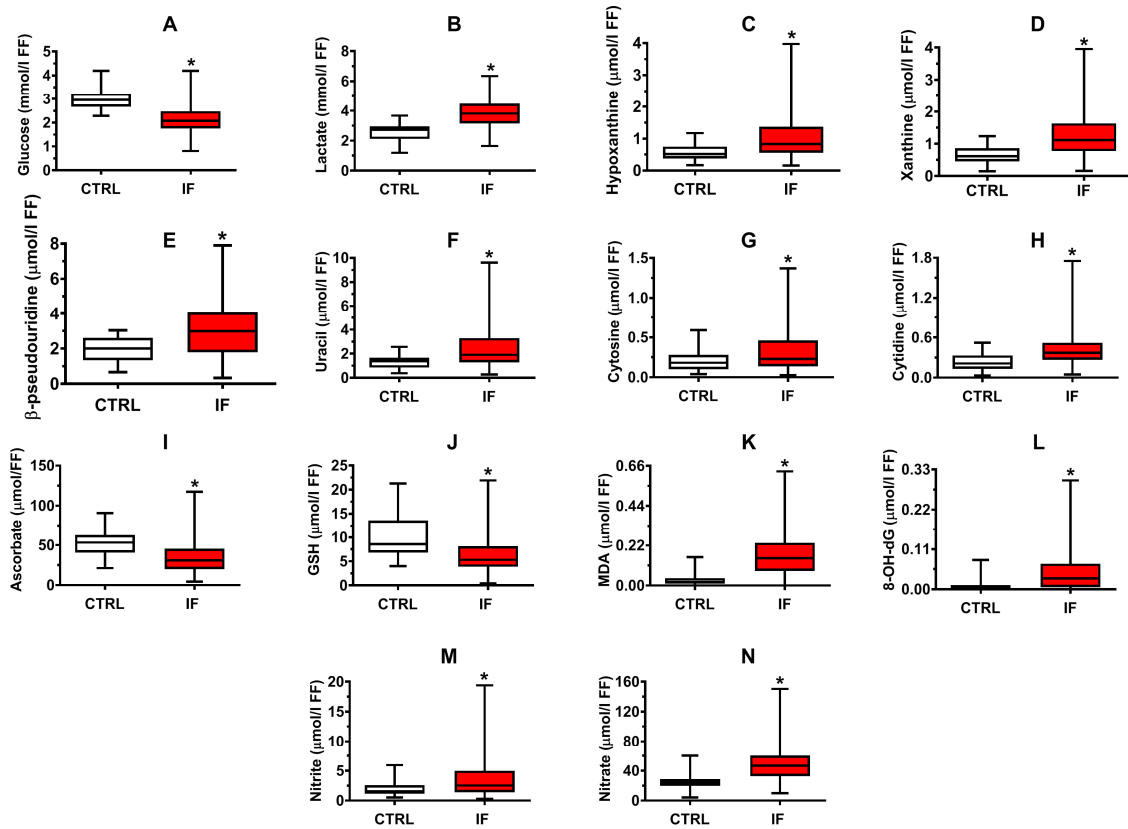

**Figure S1.** Box plots reporting median, 1st and 3rd quartiles, minimum and maximum values of the concentrations of glucose (A), lactate (B), hypoxanthine (C), xanthine (D),  $\beta$ -pseudouridine (E), uracil (F), cytosine (G), cytidine (H), ascorbate (I), GSH (J), MDA (K), 8-OH-dG (L), nitrite (M), and nitrate (N) detected in FF of 35 **control subjectss** (CTRL) and 145 infertile females (IF) pooled into a single group of infertility, independently on their clinical diagnosis. Energy related metabolites (A) and (B); purines ((C) and (D)); pyrimidines (E)-(H); water-soluble antioxidants (I) and (J); oxidative stress indexes (K) and (L); nitrosative stress indexes (M) and (N).

\*Significantly different from CTRL,  $p < 0.01$ .

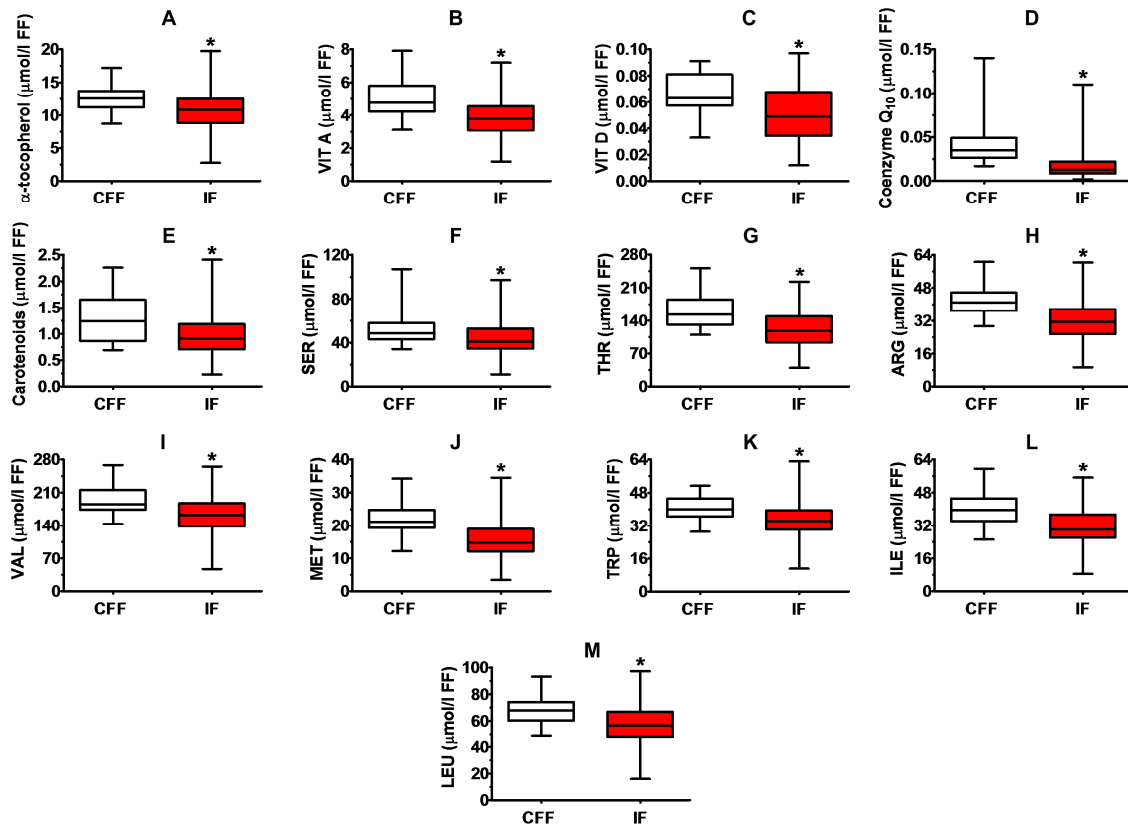

**Figure S2.** Box plots reporting median, 1st and 3rd quartiles, minimum and maximum values of the concentrations of  $\alpha$ -tocopherol (A), vitamin A (B), vitamin D (C), coenzyme Q<sub>10</sub> (D), carotenoids (E), serine (F), threonine (G), arginine (H), valine (I), methionine (J), tryptophan (K), isoleucine (L), and leucine (M) detected in FF of 35 **control subjects (CTRL)** and 145 infertile females (IF) pooled into a single group of infertility, independently on their clinical diagnosis. Fat-soluble vitamins and antioxidants (A)-(E); amino acids ((F)-(M)).

\*Significantly different from CTRL, p < 0.01.

**Table S1.** Raw data of the individual values of the Biomarker Score calculated in the 35 CFF and 145 pooled IF used to determine the ROC curve of Figure 4 (Panel C) of the main text.

| CFF | IF |
|-----|----|
| 4   | 11 |
| 4   | 11 |
| 1   | 16 |
| 1   | 20 |
| 6   | 16 |
| 3   | 11 |
| 1   | 17 |
| 6   | 12 |
| 5   | 17 |
| 8   | 13 |
| 1   | 13 |
| 9   | 19 |
| 2   | 17 |
| 4   | 17 |
| 3   | 17 |
| 6   | 15 |
| 8   | 9  |
| 5   | 16 |
| 4   | 17 |
| 3   | 12 |
| 7   | 15 |

|   |    |
|---|----|
| 4 | 14 |
| 4 | 15 |
| 0 | 19 |
| 3 | 22 |
| 6 | 15 |
| 2 | 11 |
| 2 | 10 |
| 5 | 17 |
| 2 | 18 |
| 1 | 19 |
| 4 | 21 |
| 6 | 23 |
| 7 | 14 |
| 3 | 14 |
|   | 18 |
|   | 8  |
|   | 14 |
|   | 11 |
|   | 11 |
|   | 11 |
|   | 15 |
|   | 16 |
|   | 13 |
|   | 10 |
|   | 12 |
|   | 14 |
|   | 20 |
|   | 9  |
|   | 10 |
|   | 14 |
|   | 14 |
|   | 9  |
|   | 16 |
|   | 18 |
|   | 13 |
|   | 16 |
|   | 10 |
|   | 17 |
|   | 8  |
|   | 16 |
|   | 18 |
|   | 15 |
|   | 15 |
|   | 16 |
|   | 11 |
|   | 20 |
|   | 15 |
|   | 18 |
|   | 11 |
|   | 15 |
|   | 18 |
|   | 16 |
|   | 17 |
|   | 16 |
|   | 15 |
|   | 16 |
|   | 16 |
|   | 16 |
|   | 16 |
|   | 10 |
|   | 21 |
|   | 13 |
|   | 17 |
|   | 16 |
|   | 19 |
|   | 15 |
|   | 16 |
|   | 14 |
|   | 16 |
|   | 17 |
|   | 16 |
|   | 13 |

12  
9  
16  
16  
13  
13  
16  
18  
12  
15  
14  
16  
16  
17  
14  
15  
10  
11  
15  
17  
16  
12  
13  
15  
15  
17  
15  
22  
15  
10  
14  
14  
12  
20  
19  
15  
16  
17  
12  
19  
22  
13  
14  
13  
15  
14  
11  
15  
14  
17  
11  
17  
15

**Table S2.** Parameters and statistic of the ROC curve (area under the curve, AUC) illustrated in Figure 4 (Panel C) of the main text, as calculated by GraphPad Prism 8.0 version.

|                          |                 |
|--------------------------|-----------------|
| Area under the ROC curve |                 |
| Area                     | 0.9988          |
| Std. Error               | 0.001154        |
| 95% confidence interval  | 0.9966 to 1.000 |
| P value                  | <0.0001         |
| Data                     |                 |
| Controls (CFF )          | 35              |
| Patients (IF)            | 145             |
| Missing Controls         | 0               |
| Missing Patients         | 0               |

**Table S3.** Parameters used to calculate sensitivity and specificity of the ROC curve illustrated in Figure 4 (Panel C) of the main text, as calculated by GraphPad Prism 8.0 version.

|         | Sensitivity% | 95% CI            | Specificity% | 95% CI         | Likelihood ratio |
|---------|--------------|-------------------|--------------|----------------|------------------|
| > 5.500 | 100          | 7.49% to 100.0%   | 71.43        | 70% to 85.3%   | 3.5              |
| > 6.500 | 100          | 7.49% to 100.0%   | 85.71        | 74% to 95.1%   | 7                |
| > 7.500 | 100          | 7.49% to 100.0%   | 91.43        | 84% to 98.2%   | 11.67            |
| > 8.500 | 98.62        | 5.11% to 99.83%   | 97.14        | 88% to 99.9%   | 34.52            |
| > 9.500 | 95.86        | 1.21% to 98.47%   | 100          | 100% to 100.0% |                  |
| > 10.50 | 91.03        | 5.16% to 95.14%   | 100          | 100% to 100.0% |                  |
| > 11.50 | 82.76        | 5.61% to 88.52%   | 100          | 100% to 100.0% |                  |
| > 12.50 | 77.24        | 9.55% to 83.79%   | 100          | 100% to 100.0% |                  |
| > 13.50 | 69.66        | 1.48% to 77.01%   | 100          | 100% to 100.0% |                  |
| > 14.50 | 59.31        | 0.85% to 67.38%   | 100          | 100% to 100.0% |                  |
| > 15.50 | 44.14        | 5.91% to 52.61%   | 100          | 100% to 100.0% |                  |
| > 16.50 | 27.59        | 0.50% to 35.62%   | 100          | 100% to 100.0% |                  |
| > 17.50 | 15.86        | 0.33% to 22.84%   | 100          | 100% to 100.0% |                  |
| > 18.50 | 11.03        | .440% to 17.30%   | 100          | 100% to 100.0% |                  |
| > 19.50 | 6.897        | .356% to 12.32%   | 100          | 100% to 100.0% |                  |
| > 20.50 | 4.138        | .533% to 8.789%   | 100          | 100% to 100.0% |                  |
| > 21.50 | 2.759        | .7566% to 6.912%  | 100          | 100% to 100.0% |                  |
| > 22.50 | 0.6897       | .01746% to 3.782% | 100          | 100% to 100.0% |                  |

**Table S4.** Parameters used to draw the ROC curve illustrated in Figure 4 (Panel C) of the main text, as calculated by GraphPad Prism 8.0 version.

| 100% - Specificity% | Sensitivity% |
|---------------------|--------------|
| 100.000             | 100.000      |
| 97.143              | 100.000      |
| 82.857              | 100.000      |
| 71.429              | 100.000      |
| 57.143              | 100.000      |
| 37.143              | 100.000      |
| 28.571              | 100.000      |
| 14.286              | 100.000      |
| 8.571               | 100.000      |
| 2.857               | 98.621       |
| 0.000               | 95.862       |
| 0.000               | 91.034       |
| 0.000               | 82.759       |
| 0.000               | 77.241       |
| 0.000               | 69.655       |
| 0.000               | 59.310       |
| 0.000               | 44.138       |
| 0.000               | 27.586       |
| 0.000               | 15.862       |
| 0.000               | 11.034       |
| 0.000               | 6.897        |
| 0.000               | 4.138        |
| 0.000               | 2.759        |
| 0.000               | 0.690        |
| 0.000               | 0.000        |
